# Supplementary material for: Electrochemical biomass valorization of furfural to maleic acid by modulating selectivity with Bi-doped lead oxide
Source: Royal Society of Chemistry journal article supplement (doi:10.1039/d3ta00114h), 2023-01-01
Supplement: d3ta00114h1.pdf [file d3ta00114h1.pdf]

Supporting Information

**Electrochemical Biomass Valorization of Furfural to  
Maleic Acid by Modulating Selectivity with Bi-doped Lead  
Oxide**

**Eunchong Lee<sup>a</sup>, Jae Hyung Kim<sup>b</sup>, Juhyung Choi<sup>a</sup>, Yewon Hong<sup>a</sup>, Dongwoo Shin<sup>a</sup>, Hyewon Yun<sup>ac</sup>, Jimin Kim<sup>ac</sup>, Gwangsu Bak<sup>a</sup>, Seongin Hong<sup>a</sup> and Yun Jeong Hwang<sup>\*ac</sup>**

<sup>a</sup>Department of Chemistry, College of Natural Sciences, Seoul National University (SNU), Seoul 08826, Republic of Korea.

<sup>b</sup>Clean Fuel Research Laboratory, Korea Institute of Energy Research, Daejeon 34129, Republic of Korea.

<sup>c</sup>Center for Nanoparticle Research, Institute for Basic Science (IBS), Seoul 08826, Republic of Korea.

\*e-mail: [yjhwang1@snu.ac.kr](mailto:yjhwang1@snu.ac.kr)

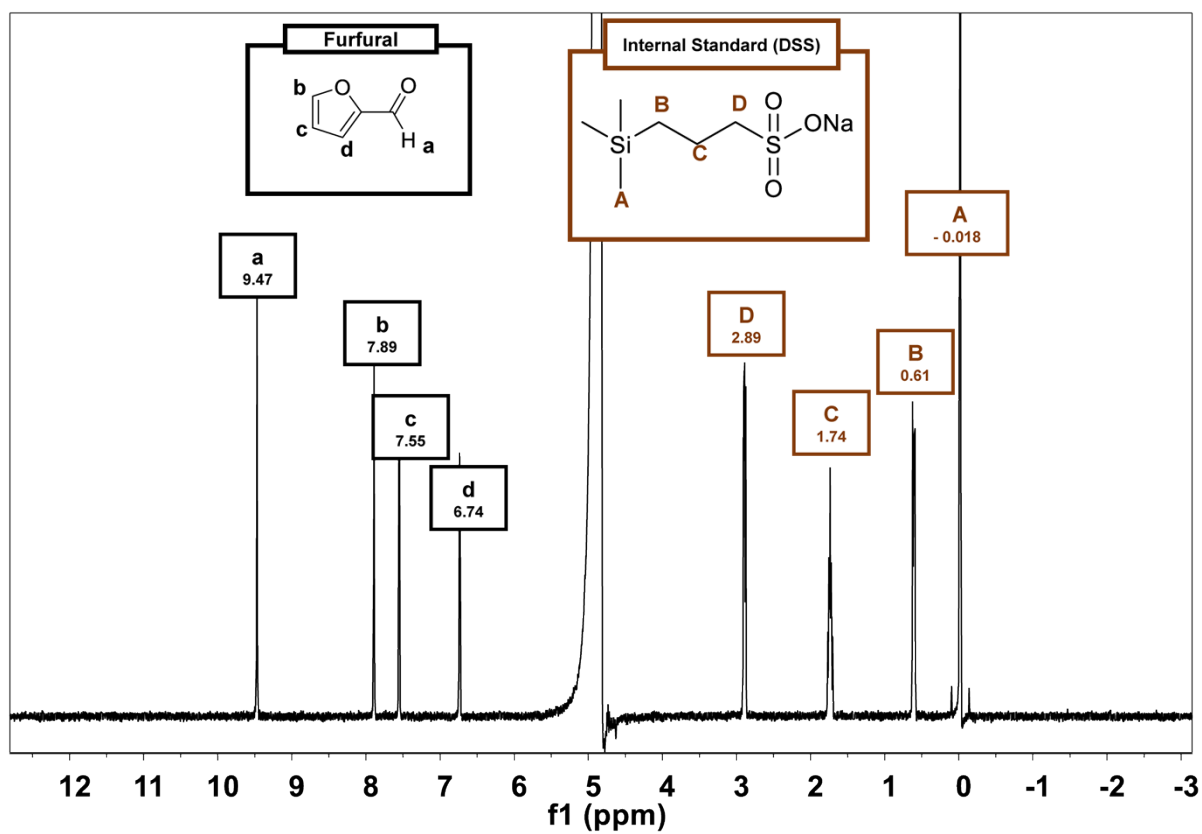

Fig. S1 NMR spectra of furfural

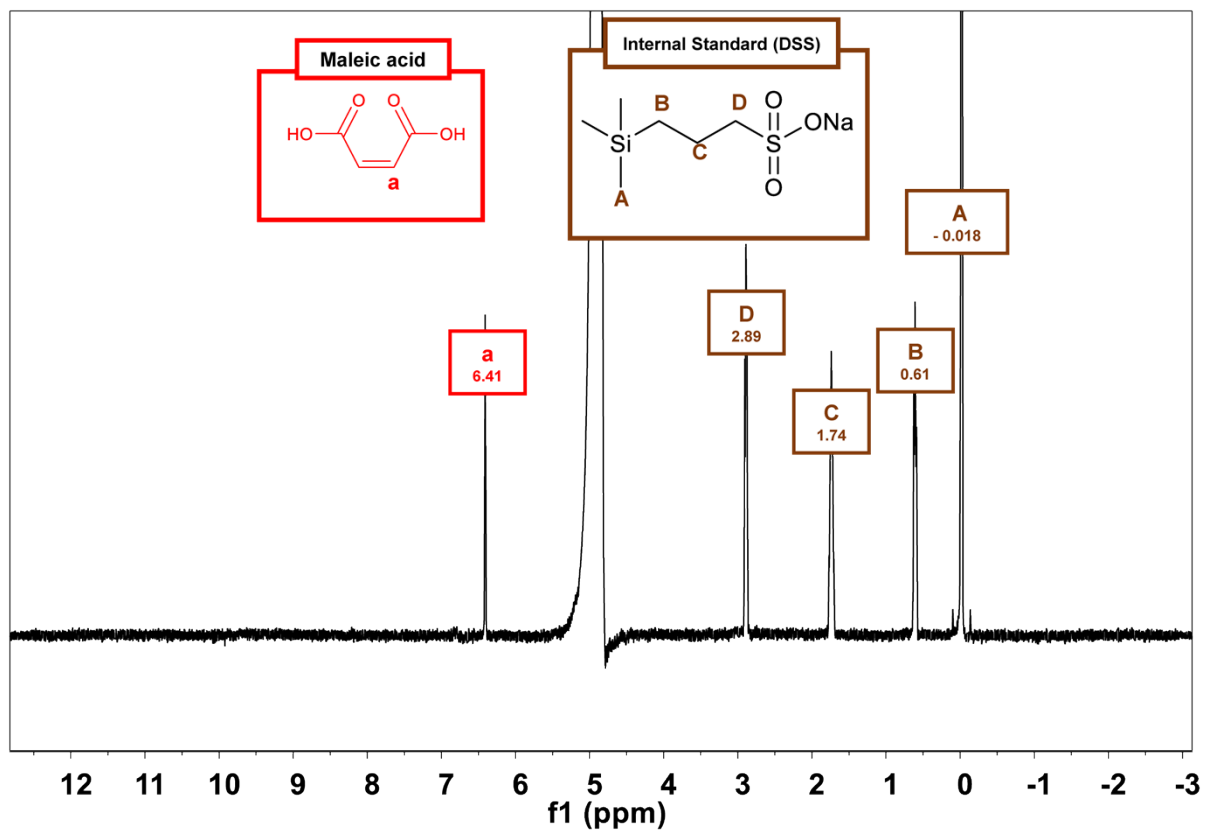

Fig. S2 NMR spectra of maleic acid

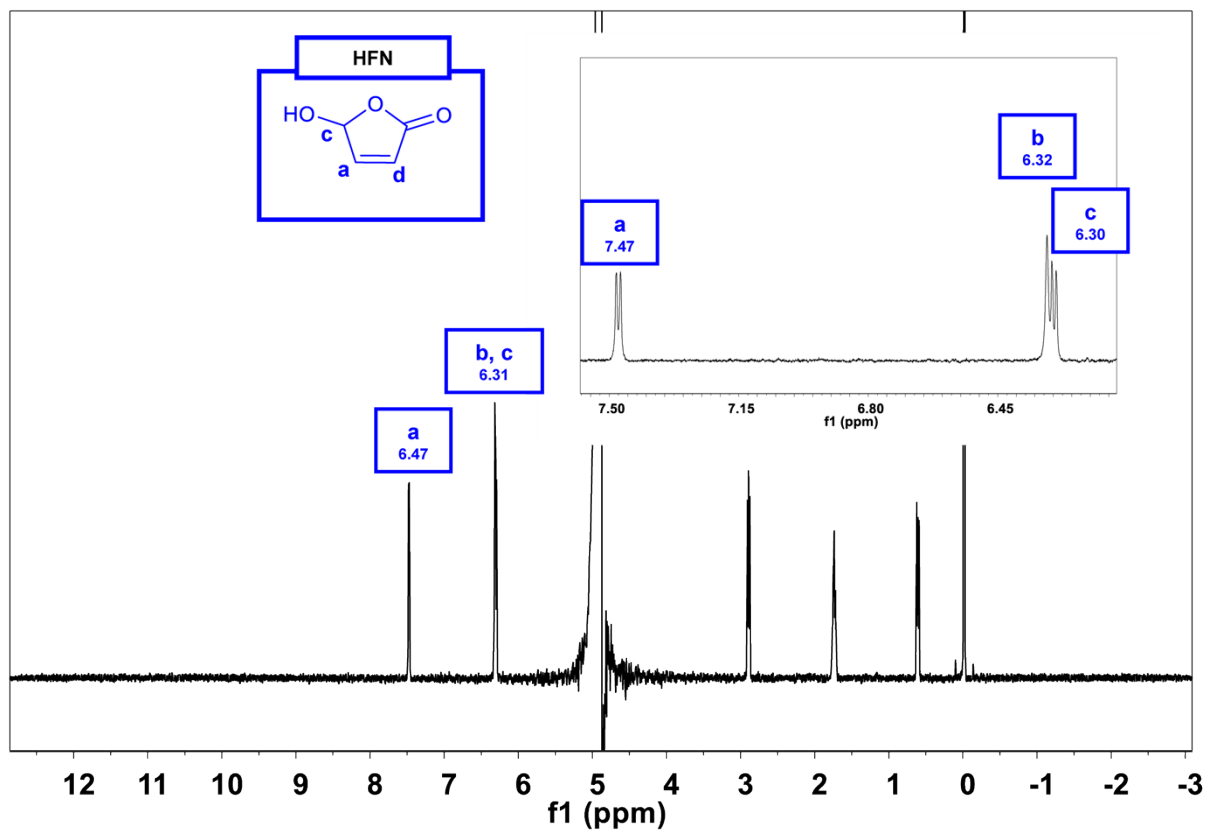

Fig. S3 NMR spectra of HFN

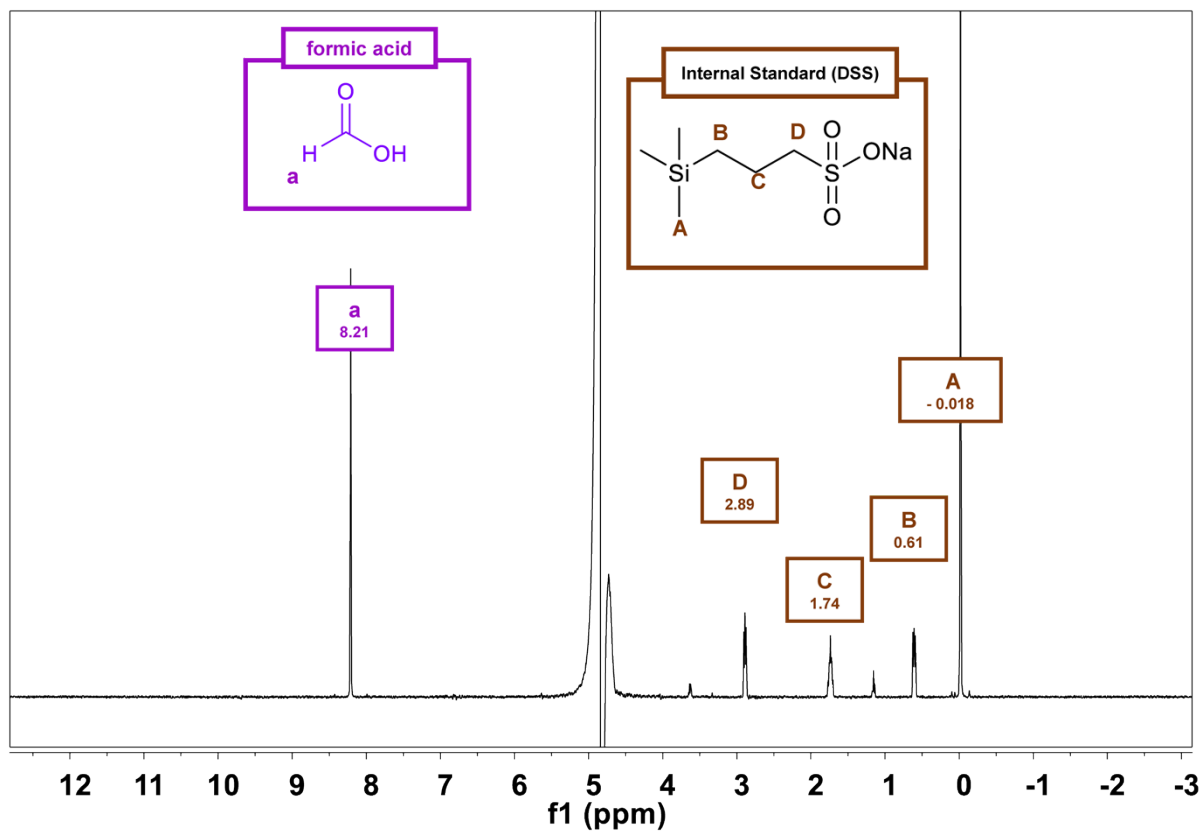

Fig. S4 NMR spectra of formic acid

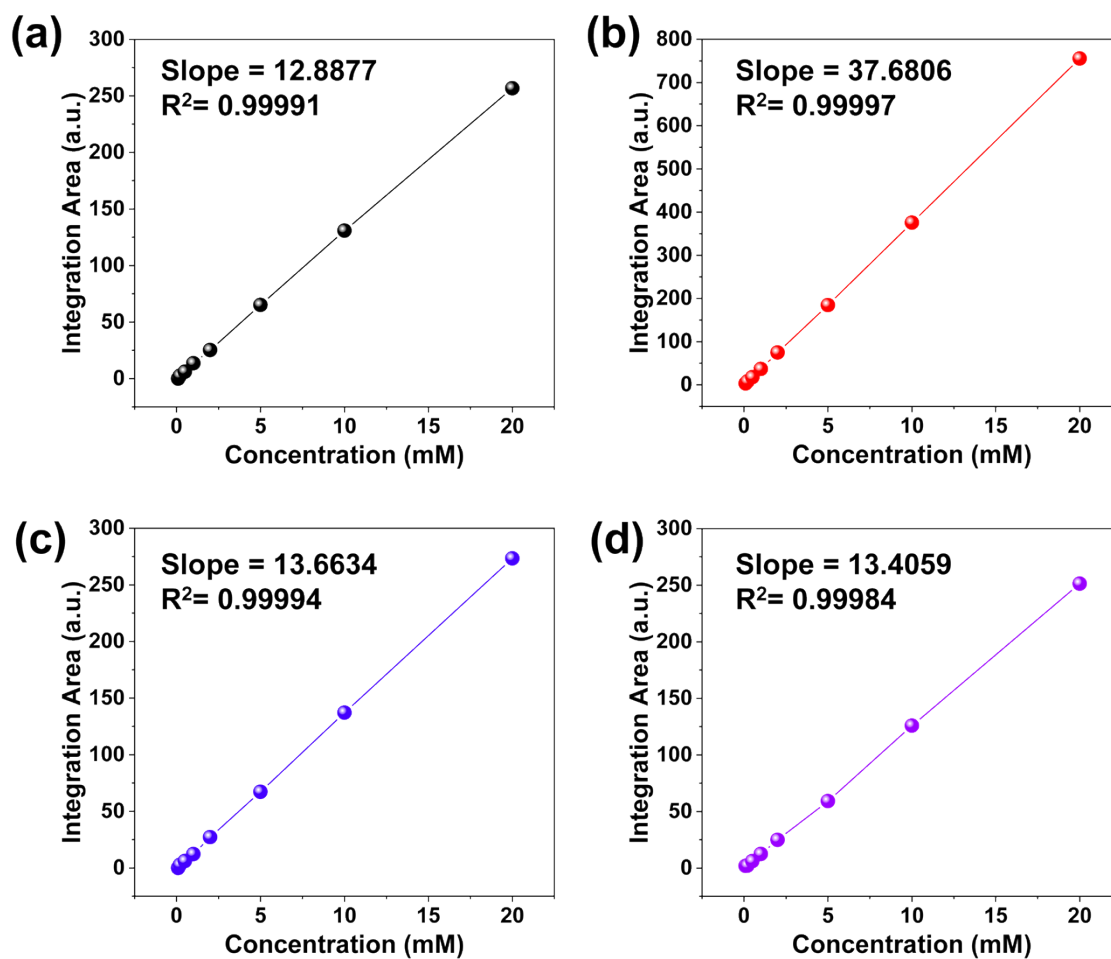

Fig. S5 NMR Calibration curves of (a) FF, (b) MA, (c) HFN, (d) FA

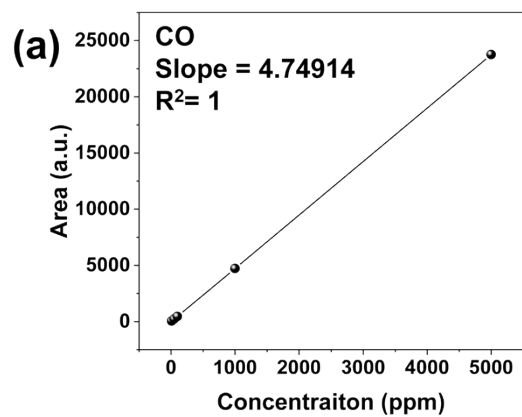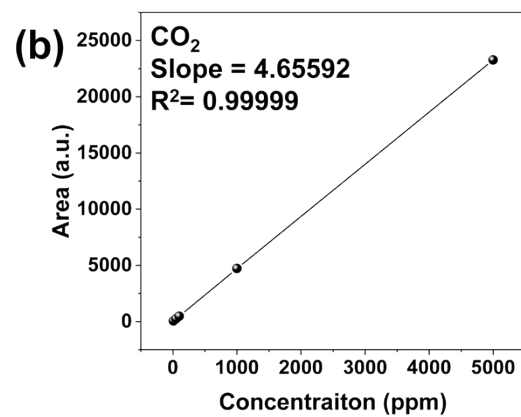

**Fig. S6** Calibration Curves of (a) CO and (b) CO<sub>2</sub>.

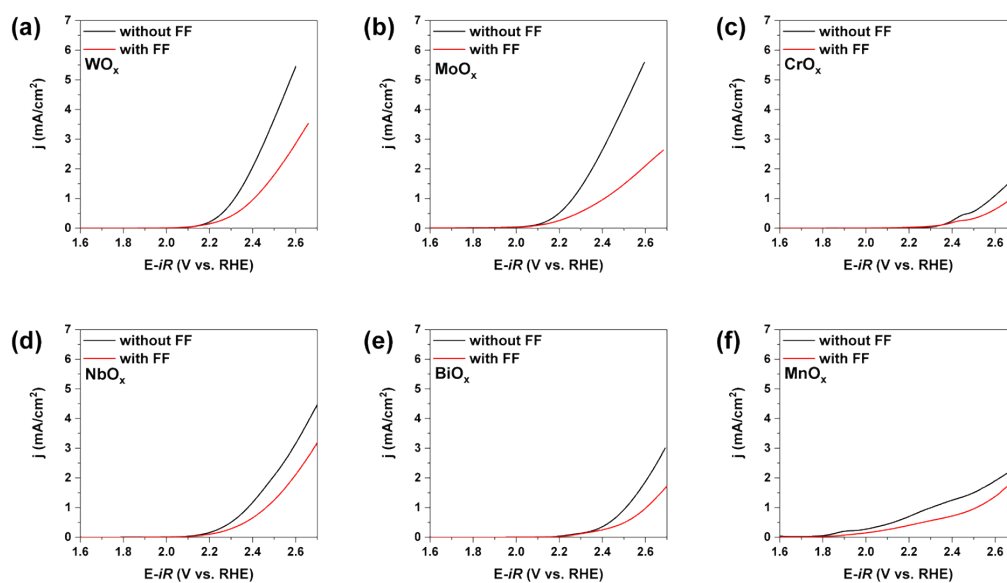

**Fig. S7** LSV comparison without and with 10 mM FF in 0.1 M H<sub>2</sub>SO<sub>4</sub> using various metal oxides at a scan rate of 5 mV/s/



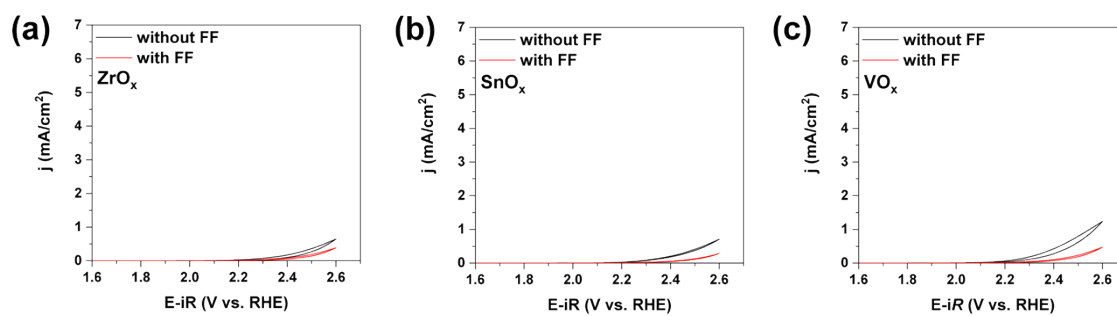

**Fig. S8** CV comparison without and with 10 mM FF in 0.1 M  $\text{H}_2\text{SO}_4$  using various metal oxides at a scan rate of 50 mV/s.

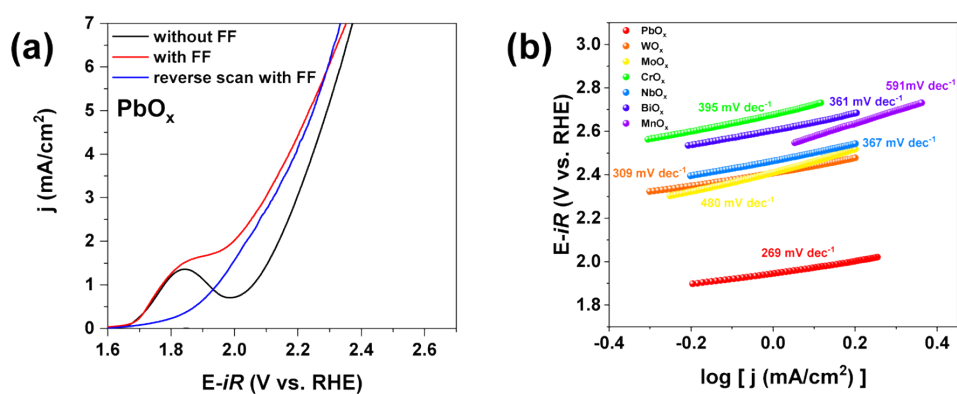

**Fig. S9** (a) LSV curves of  $\text{PbO}_x$  without and with 10 mM FF in 0.1 M  $\text{H}_2\text{SO}_4$  at a scan rate of 5 mV/s. (b) Tafel plot of FFOR condition using various metal oxides.

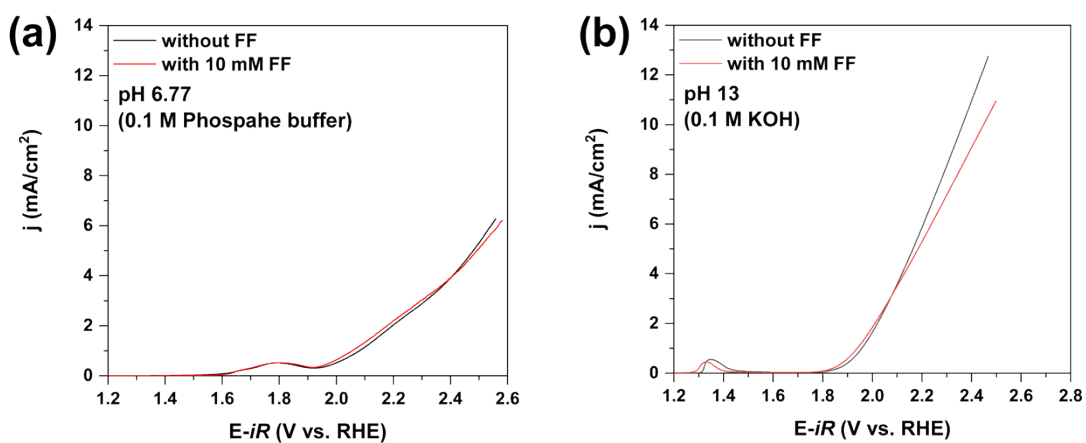

**Fig. S10** LSV curves of  $\text{PbO}_x$  without and with 10 mM FF in (a) 0.1 M phosphate buffer ( $\text{NaHPO}_4/\text{Na}_2\text{PO}_4$ ) and (b) 0.1 M KOH at a scan rate of 5 mV/s.

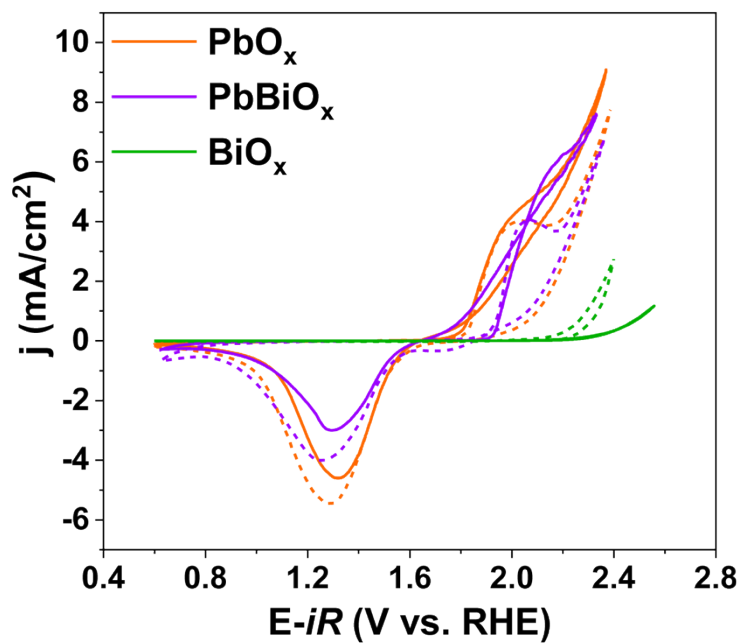

**Fig. S11** CV curves comparison without/with 10 mM FF using PbO<sub>x</sub>, PbBiO<sub>x</sub>, and BiO<sub>x</sub> at a scan rate of 20 mV/s. Dash lines are conducted without furfural in 0.1 M H<sub>2</sub>SO<sub>4</sub>. Straight lines are conducted with 10 mM FF in 0.1 M H<sub>2</sub>SO<sub>4</sub>.

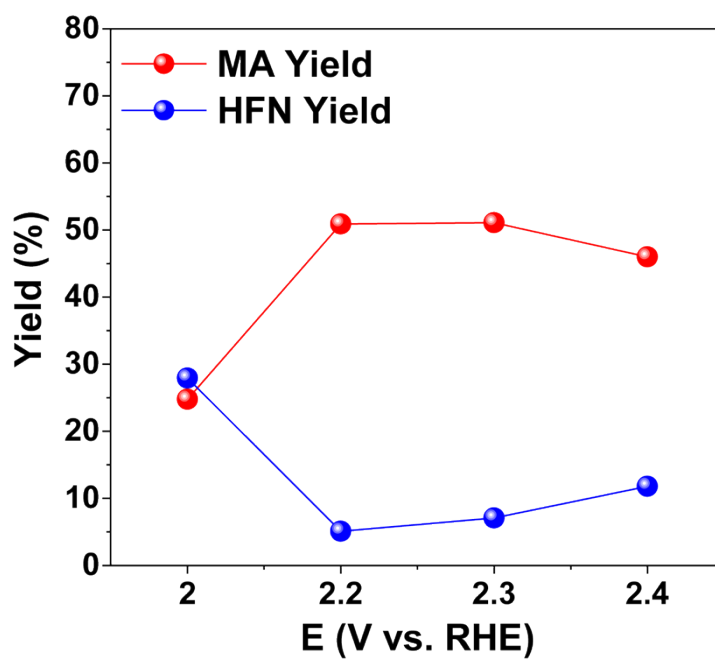

**Fig. S12** Yield of MA and HFN using  $\text{PbBiO}_x$  depending on the applied potential with 10 mM FF in 0.1 M  $\text{H}_2\text{SO}_4$ .

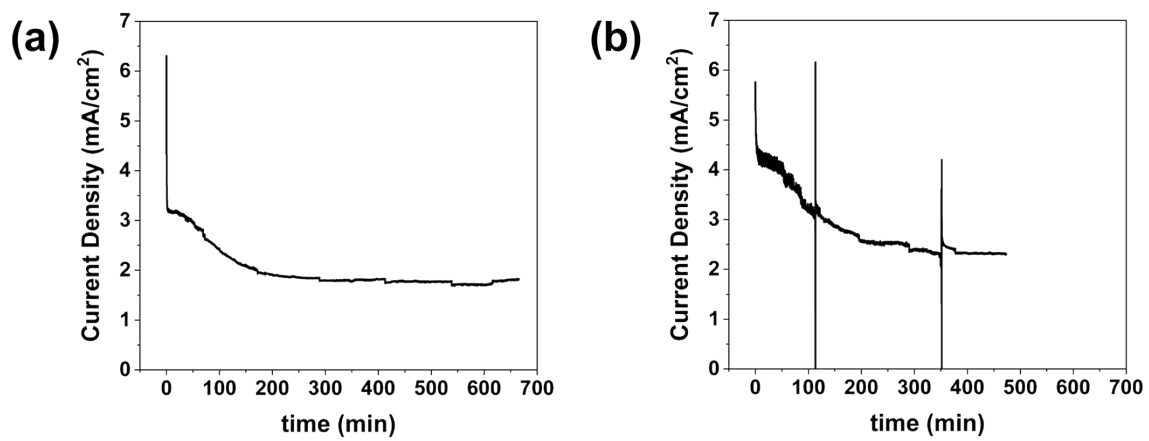

**Fig. S13** CA curves in 0.1 M H<sub>2</sub>SO<sub>4</sub> 15 mL with 10 mM FF using (a) PbO<sub>x</sub> and (b) PbBiO<sub>x</sub>.

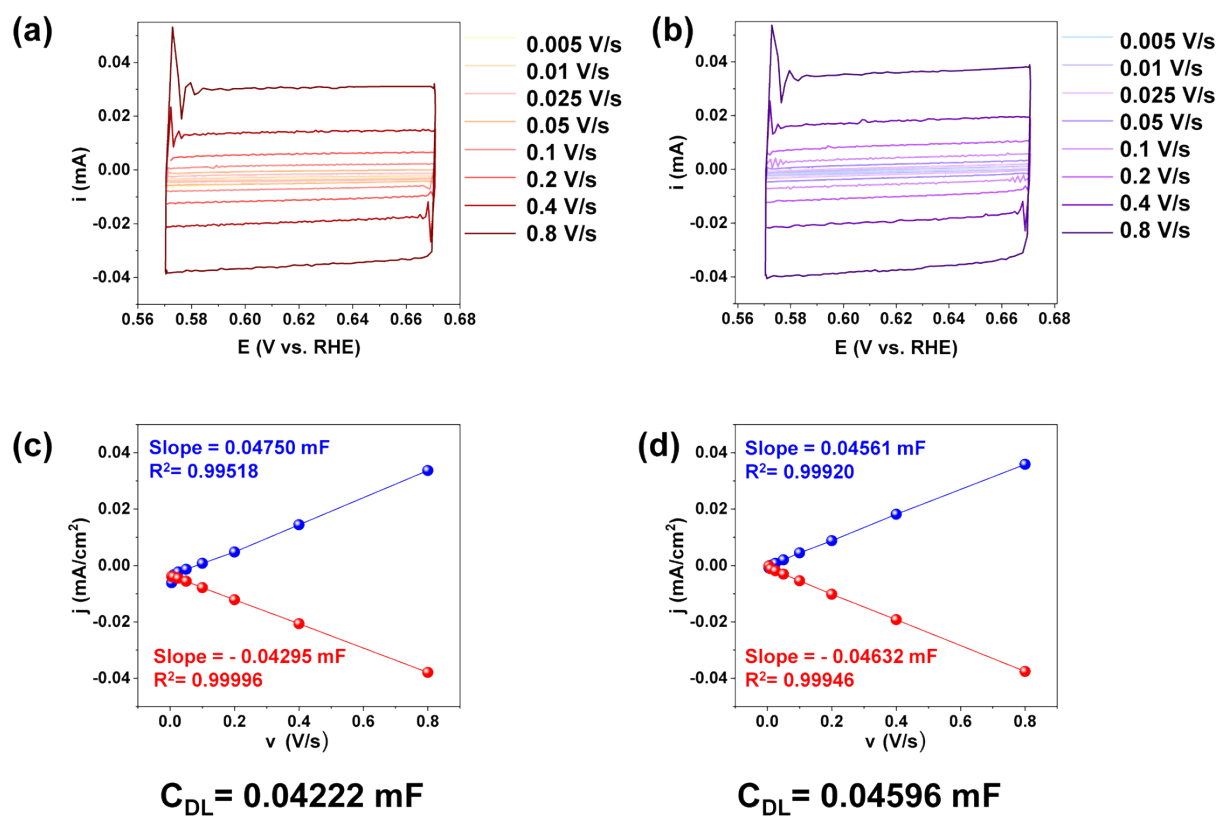

**Fig. S14** Scan rate dependence of CVs of (a)  $\text{PbO}_x$  and (b)  $\text{PbBiO}_x$ . A plot of current versus scan rate to determine capacitance of (c)  $\text{PbO}_x$  and (d)  $\text{PbBiO}_x$  with calculated  $C_{DL}$  values.

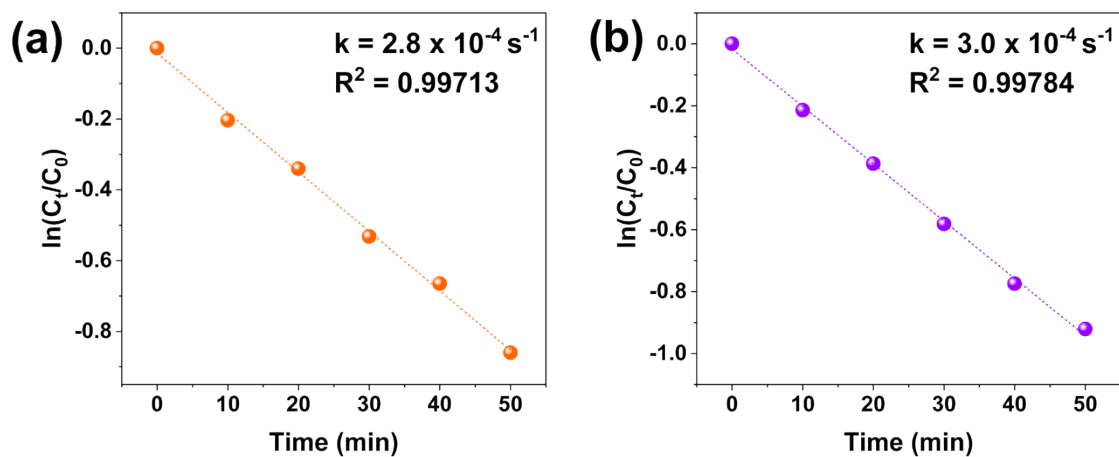

**Fig. S15** Plot of concentration variation to time of (a)  $\text{PbO}_x$ , and (b)  $\text{PbBiO}_x$  obtained during FFOR at 2.2 V vs. RHE with 10 mM FF. The plot showed the linearity of the log scale of concentration to time. the reaction order follows 1<sup>st</sup> order rate reaction.



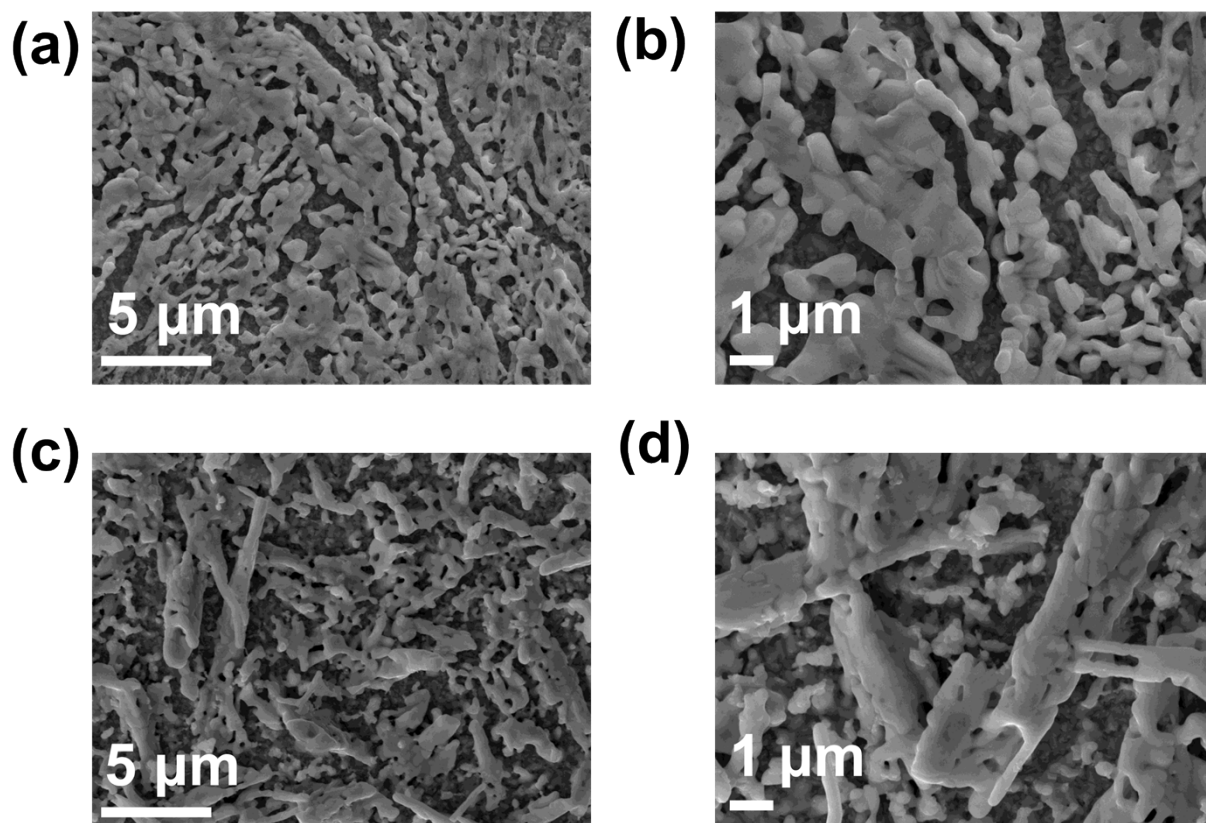

**Fig. S16** (a) Low, and (b) high magnification SEM images of the as-prepared  $\text{PbO}_x$  before FFOR. (c) Low, and (d) high magnification SEM images of the as-prepared  $\text{PbBiO}_x$  before FFOR.

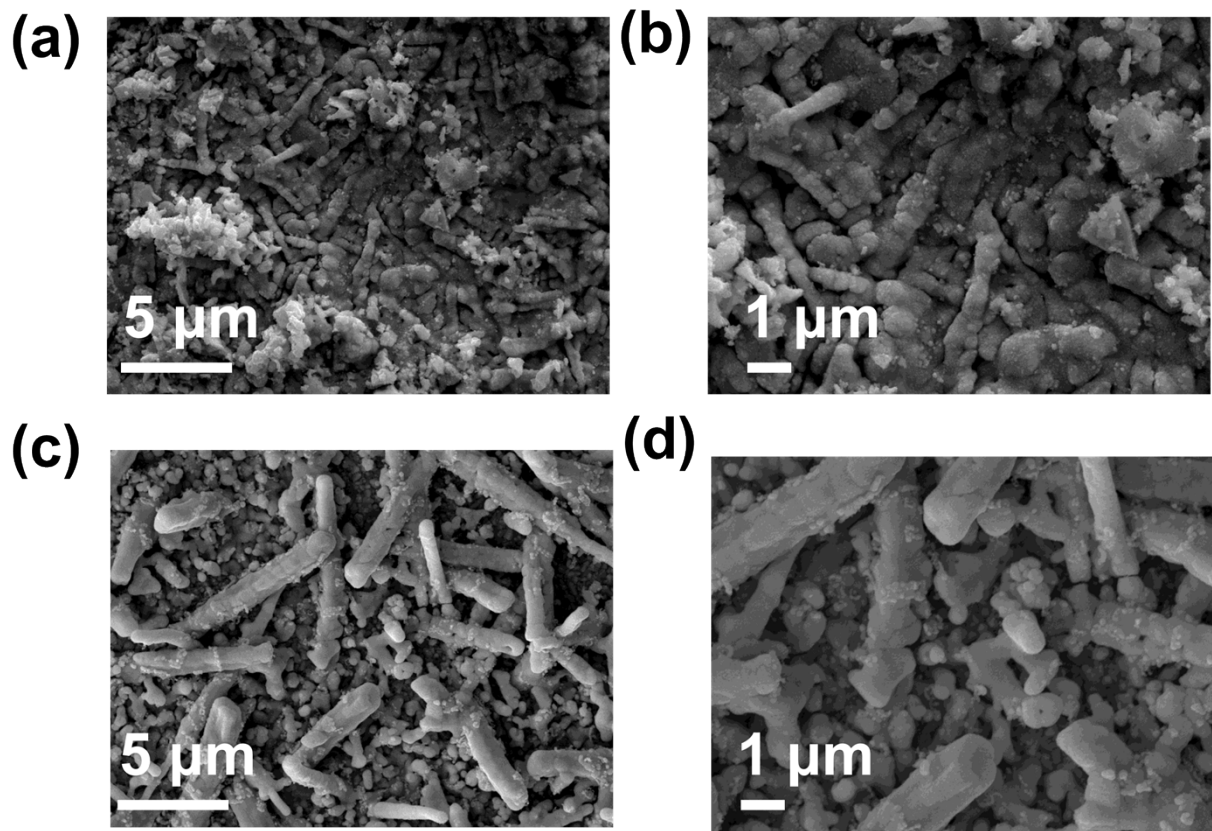

**Fig. S17.** (a) Low, and (b) high magnification SEM images of  $\text{PbO}_x$  anode after FFOR. (c) low, (d) high magnification SEM images of  $\text{PbBiO}_x$  anode after FFOR.

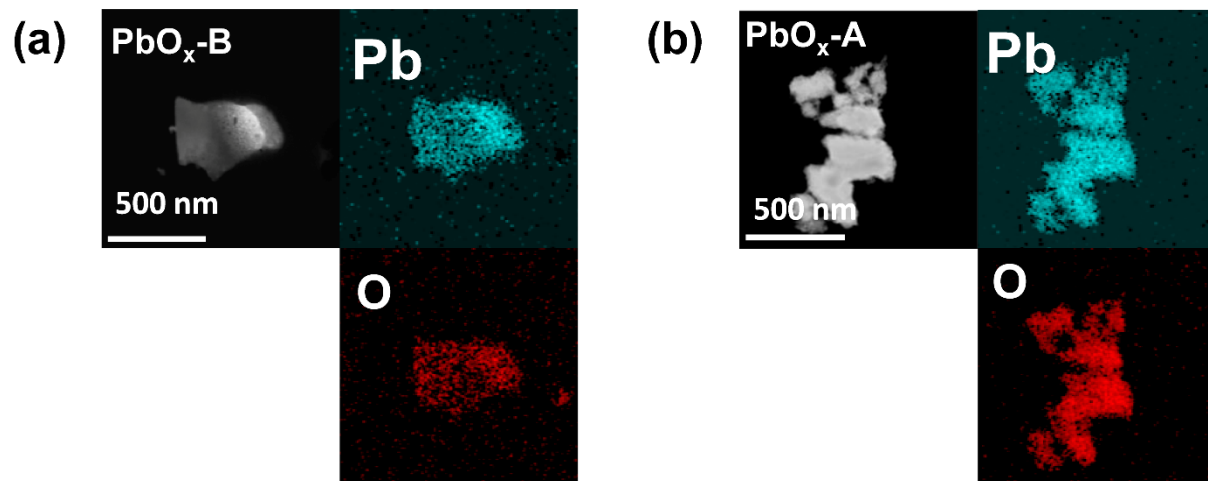

**Fig. S18.** STEM-EDS mappings of (a)  $\text{PbO}_x\text{-B}$  and (b)  $\text{PbO}_x\text{-A}$ .

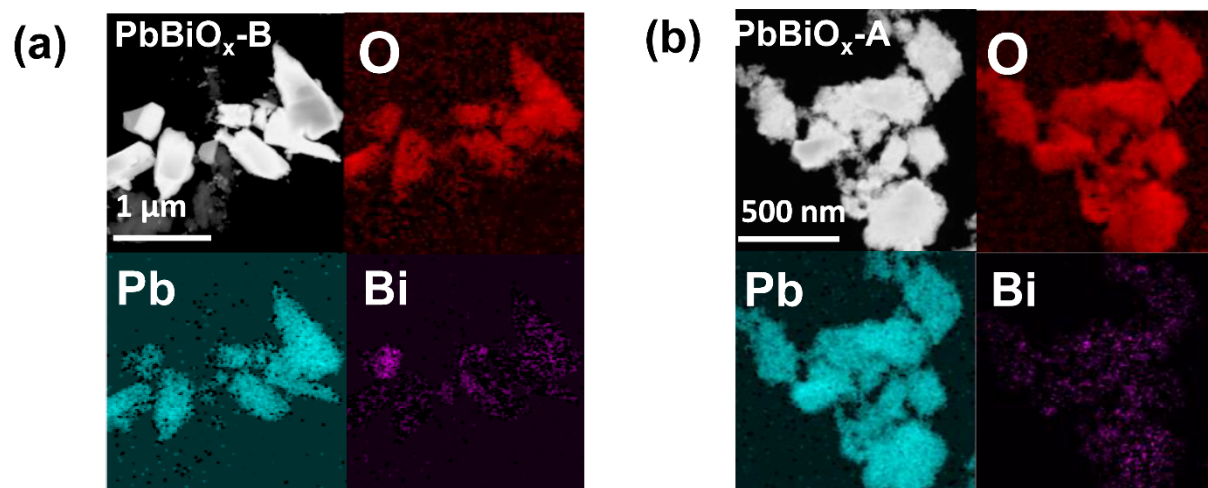

**Fig. S19** STEM-EDS mappings of (a) PbBiO<sub>x</sub>-B and (b) PbBiO<sub>x</sub>-A.

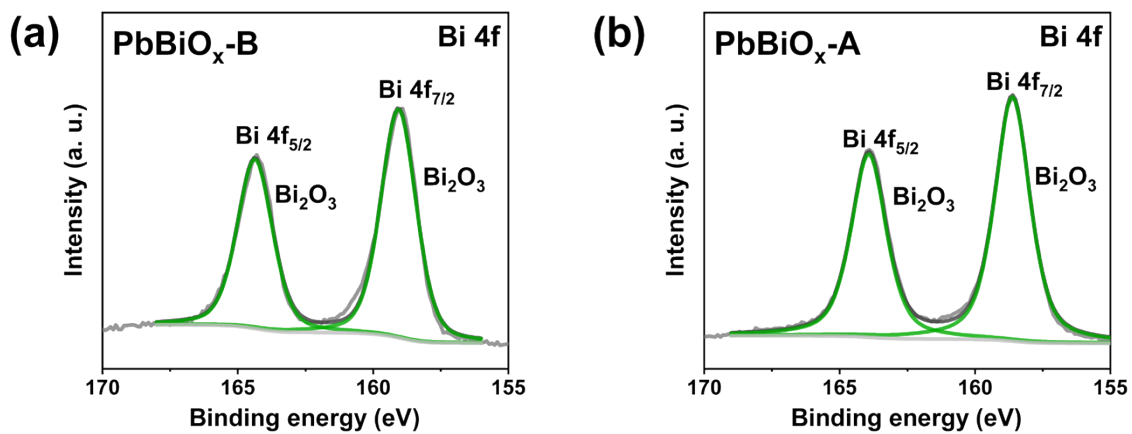

**Fig. S20** Bi 4f XPS of (a) PbBiO<sub>x</sub>-B, and (b) PbBiO<sub>x</sub>-A

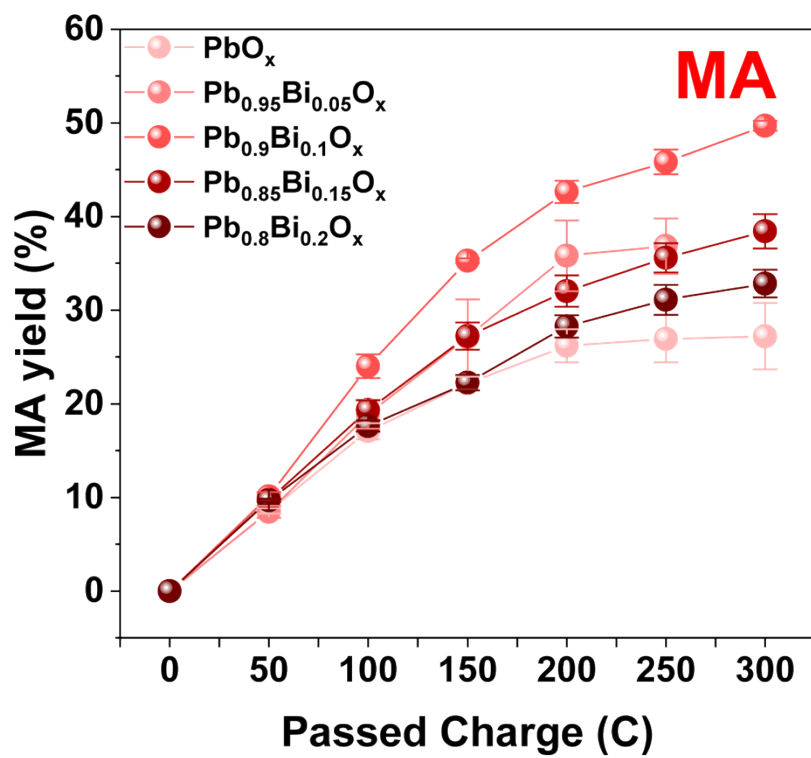

Fig. S21 Graph of MA yield to passed charge.

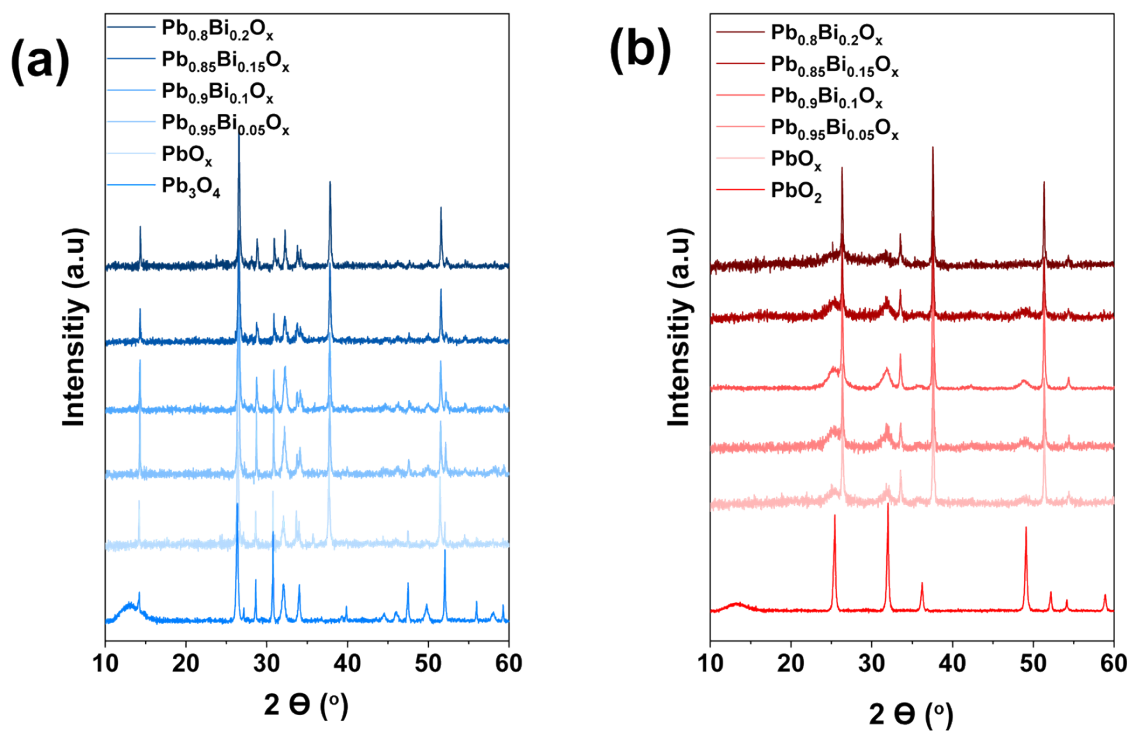

**Fig. S22** Overall XRD spectra of  $\text{PbBiO}_x$  containing different Bi contents of (a) before reaction, and (b) after reaction.

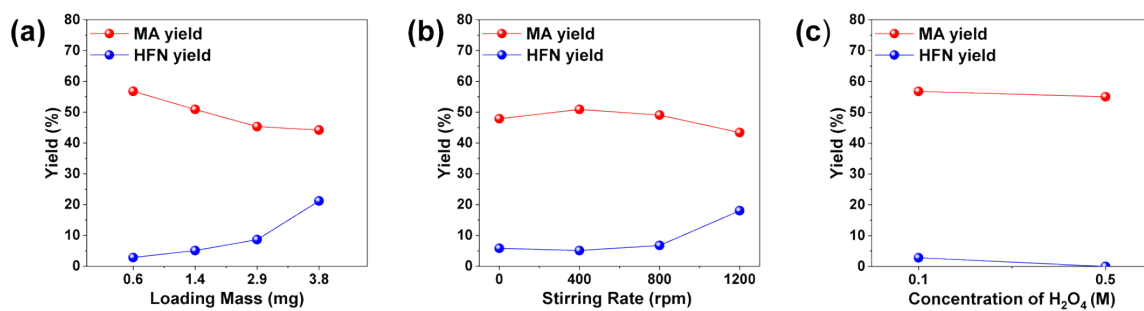

**Fig. S23** HFN yield, MA yield trends depending on (a) loading mass, (b) stirring rate, (c) concentrations of H<sub>2</sub>SO<sub>4</sub> for electrolyte using Pb<sub>0.9</sub>Bi<sub>0.1</sub>O<sub>x</sub>.



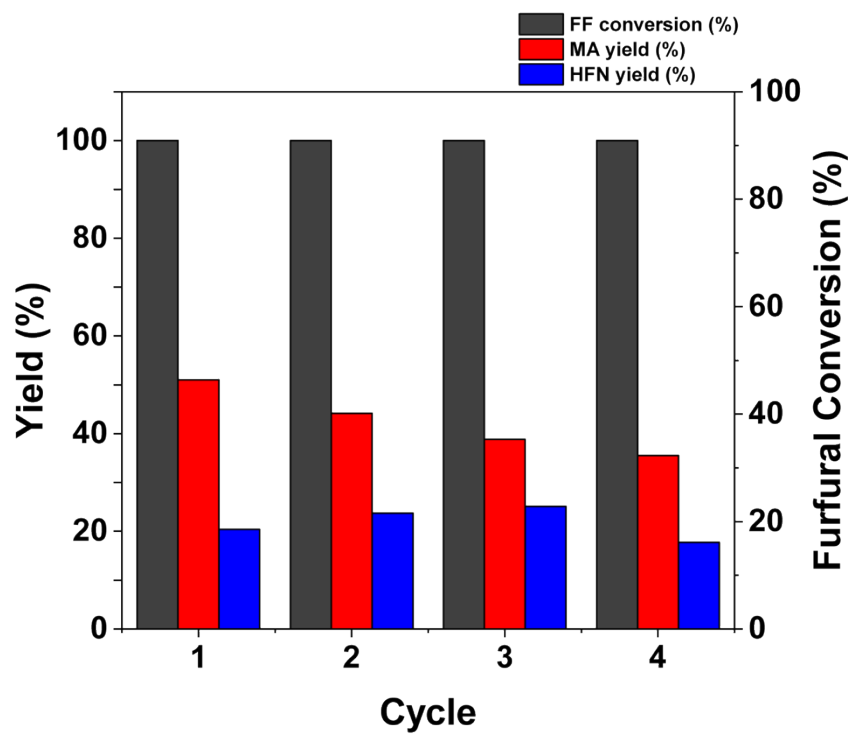

**Fig. S24** Cyclic measurement of FFOR using the same  $\text{PbBiO}_x$  catalyst with 10 mM FF at 2.2 V vs. RHE.

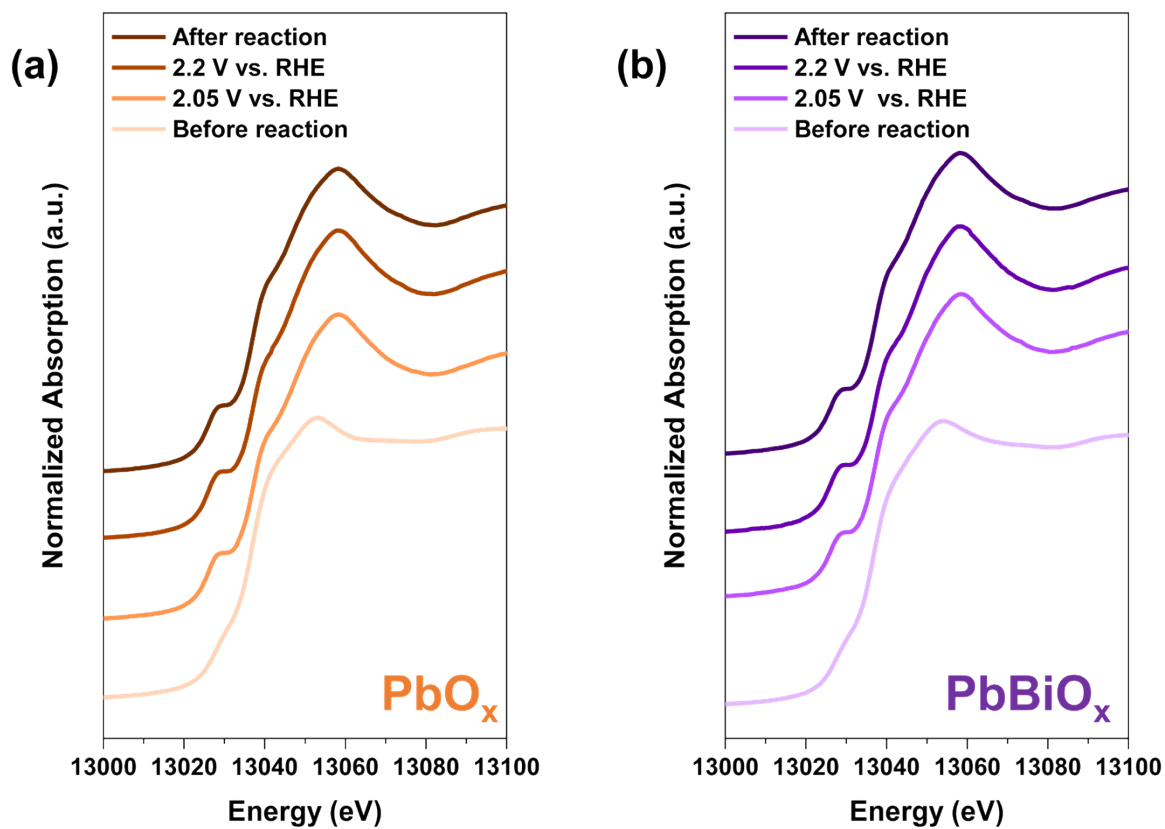

**Fig. S25** Operando XANES of Pb L<sub>3</sub> of (a) PbO<sub>x</sub>, and (b) PbBiO<sub>x</sub> under before reaction, 2.05 V vs. RHE, 2.2 V vs. RHE, and after reaction without FF.

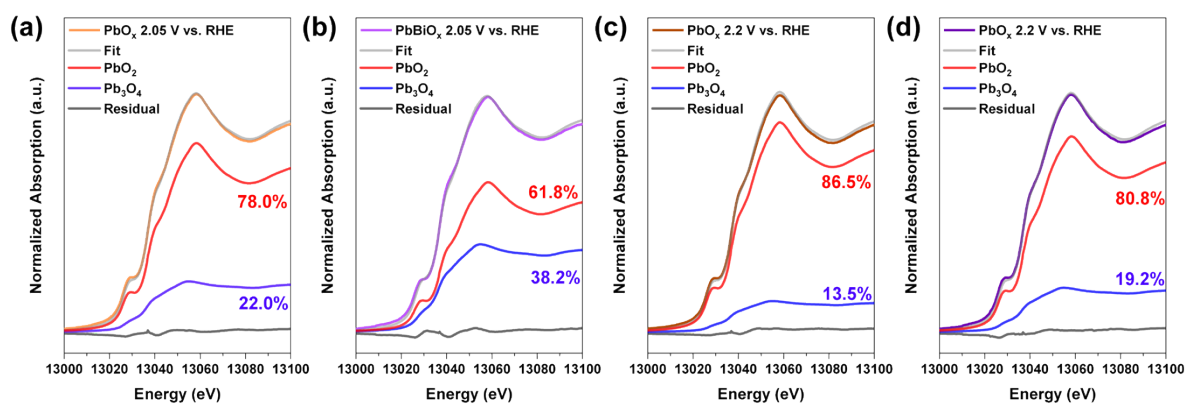

**Fig. S26** LCF results of *operando* XANES of (a)  $\text{PbO}_x$ , (b)  $\text{PbBiO}_x$  at 2.05 V vs. RHE, (c)  $\text{PbO}_x$ , and (d)  $\text{PbBiO}_x$  at 2.2 V vs. RHE.

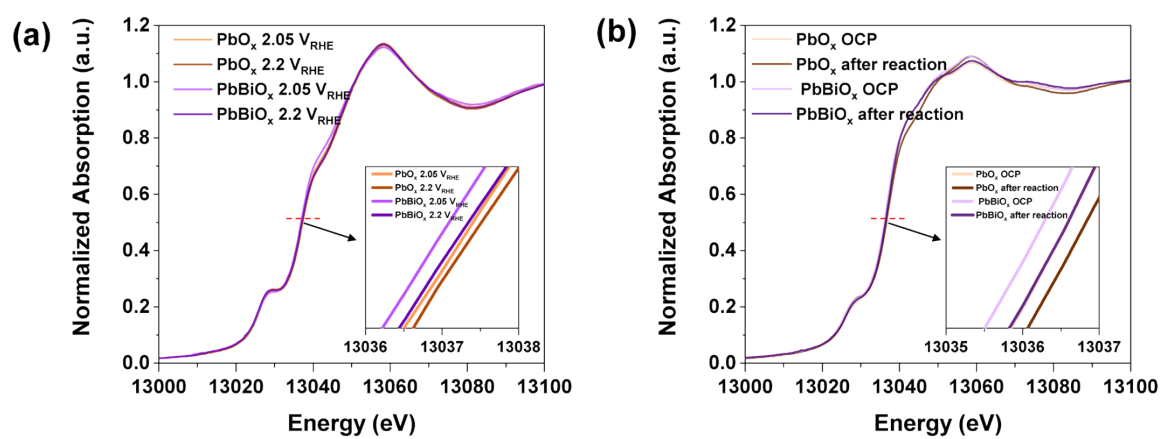

**Fig. S27** Overlapped *operando* XANES of Pb L<sub>3</sub> between PbO<sub>x</sub>, and PbBiO<sub>x</sub> under (a) 2.05 V vs. RHE, and (b) 2.2 V vs. RHE.

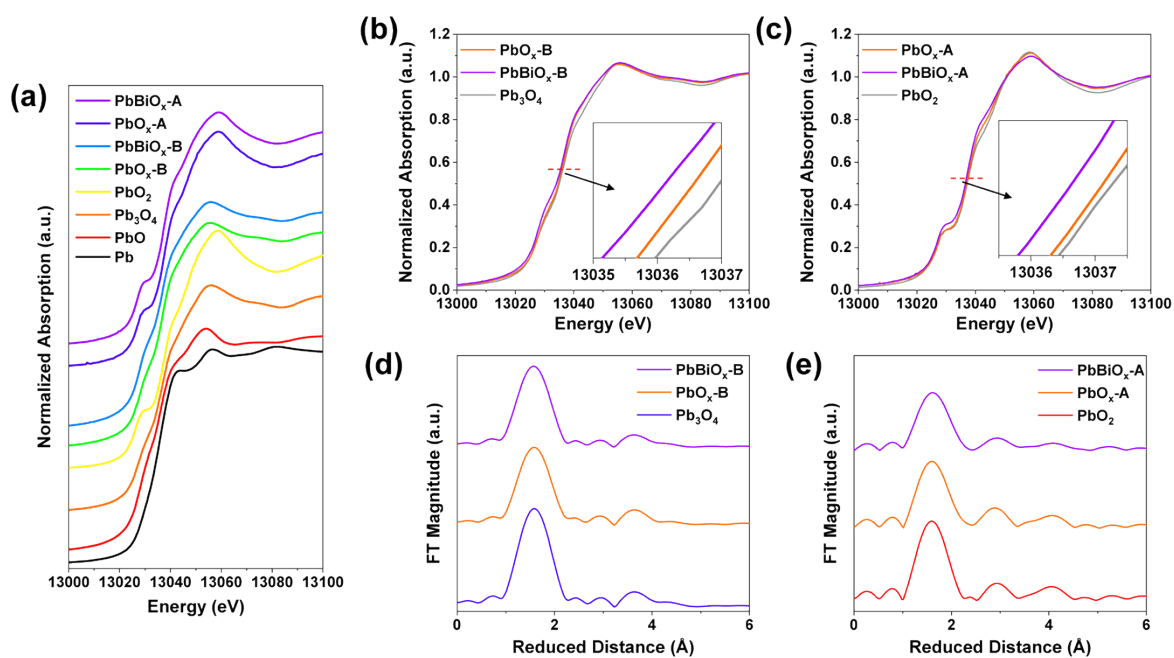

**Fig. S28** (a) Overall *ex-situ* Pb L<sub>3</sub> XANES spectra, (b) *ex-situ* XANES spectra of Pb<sub>3</sub>O<sub>4</sub>, PbO<sub>x</sub>-B, and PbBiO<sub>x</sub>-B. (c) *ex-situ* XANES spectra of PbO<sub>2</sub>, PbO<sub>x</sub>-A, and PbBiO<sub>x</sub>-A. (d) *ex-situ* EXAFS of Pb<sub>3</sub>O<sub>4</sub>, PbO<sub>x</sub>-B, and PbBiO<sub>x</sub>-B. (e) EXAFS of PbO<sub>2</sub>, PbO<sub>x</sub>-A, and PbBiO<sub>x</sub>-A.

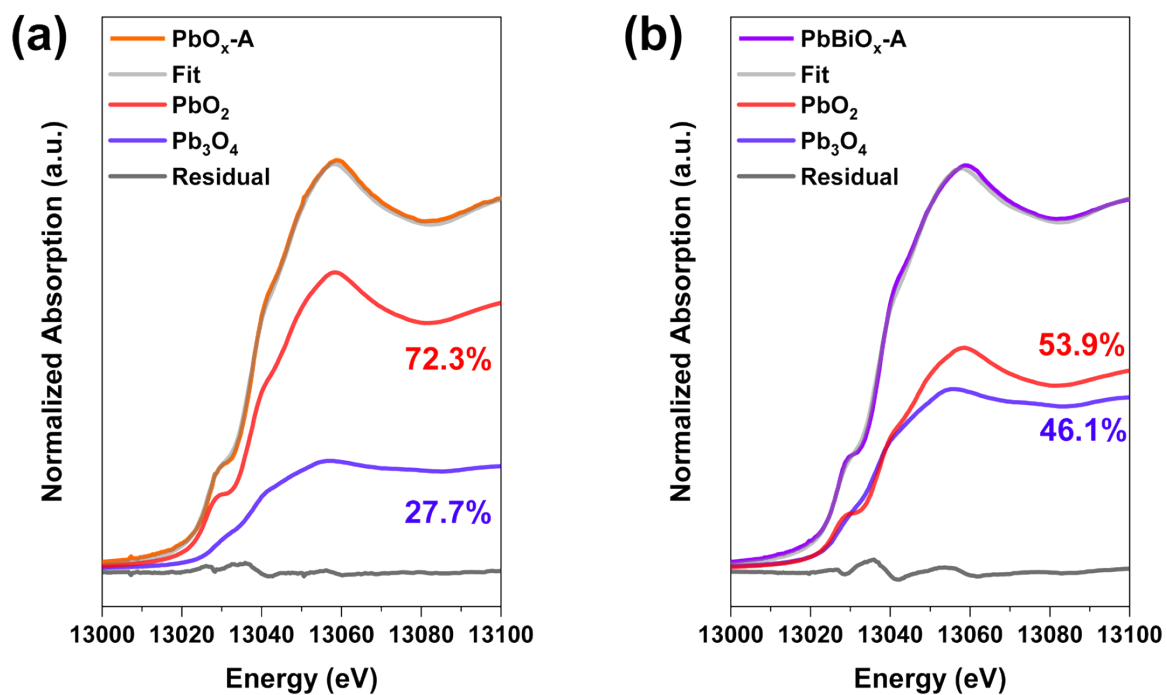

Fig. S29 (a) *ex-situ* LCF results of  $\text{PbO}_x\text{-A}$ , and (b)  $\text{PbBiO}_x\text{-A}$ .

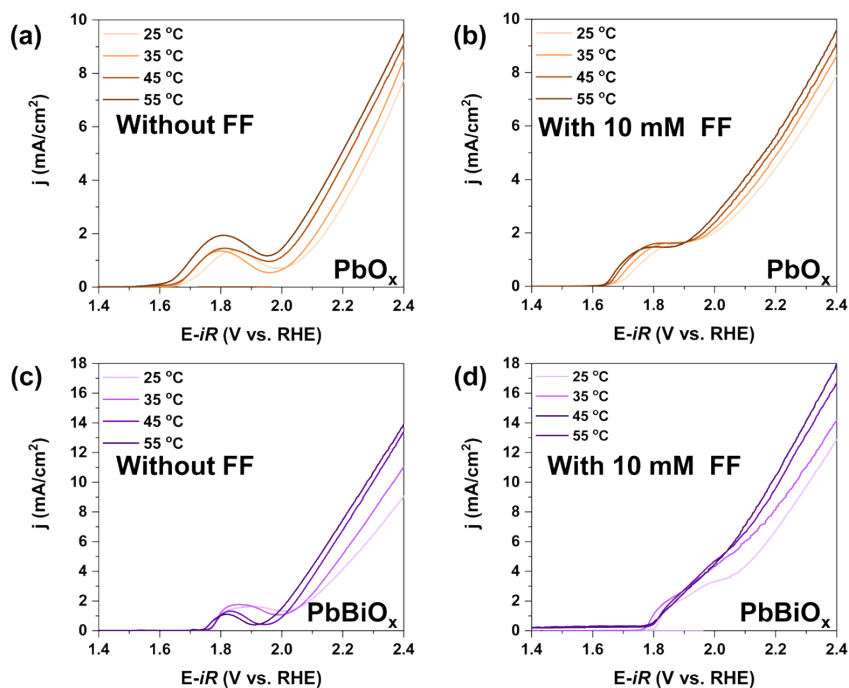

**Fig. S30** LSV curves of under different temperature at 25, 35, 45, and 55 °C using (a) PbO<sub>x</sub> without 10 mM FF, (b) PbO<sub>x</sub> with 10 mM FF, (c) PbBiO<sub>x</sub> without 10 mM FF, and (d) PbBiO<sub>x</sub> with 10 mM FF at a scan rate of 5 mV/s.

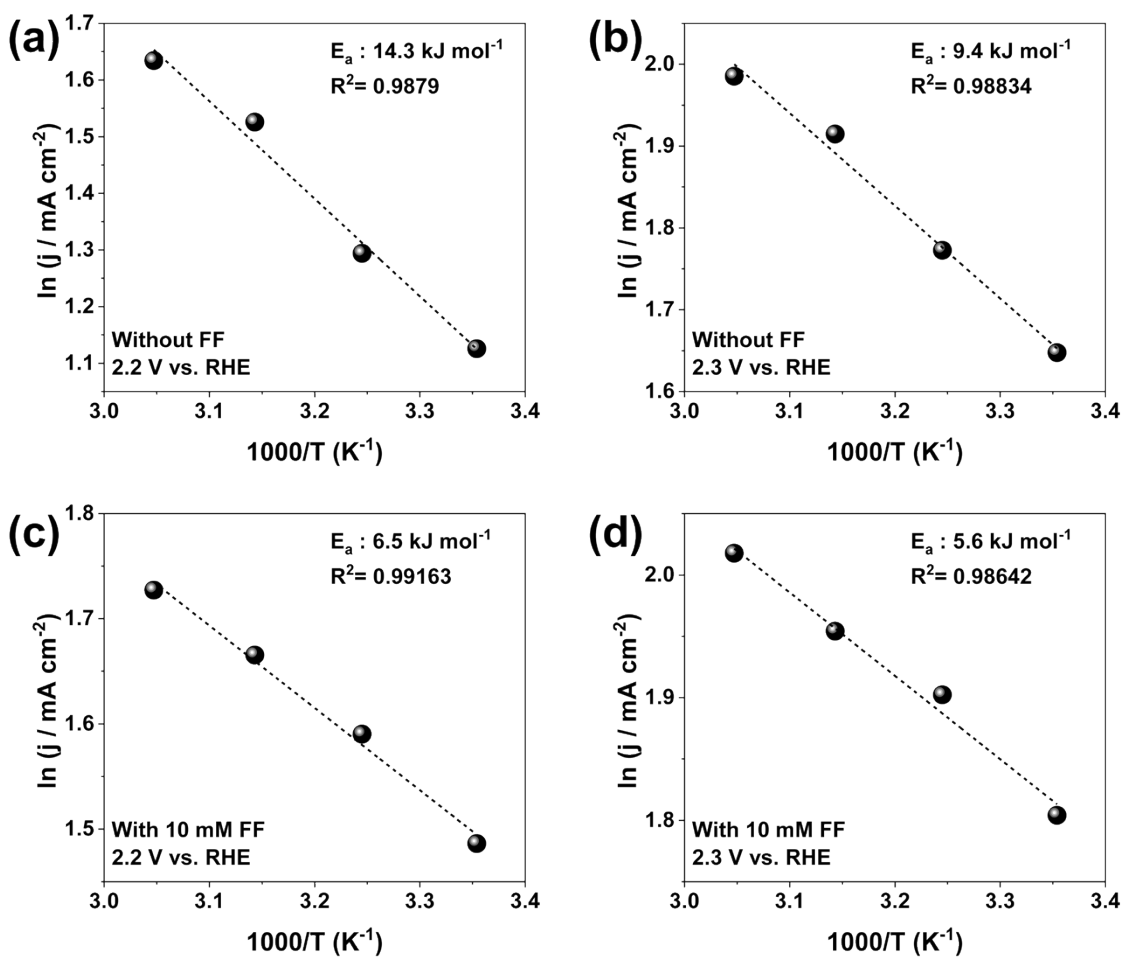

**Fig. S31** Activation energy ( $E_a$ ) of  $\text{PbO}_x$  in  $0.1 \text{ M H}_2\text{SO}_4$  at (a) 2.2 V vs. RHE, and (b) 2.3 V vs. RHE, and with 10 mM FF in  $0.1 \text{ M H}_2\text{SO}_4$  at (c) 2.2 V vs. RHE, and (d) 2.3 V vs. RHE. The  $E_a$  value was obtained from slope based on Arrhenius plot of log scale of current densities to reciprocal temperature values.



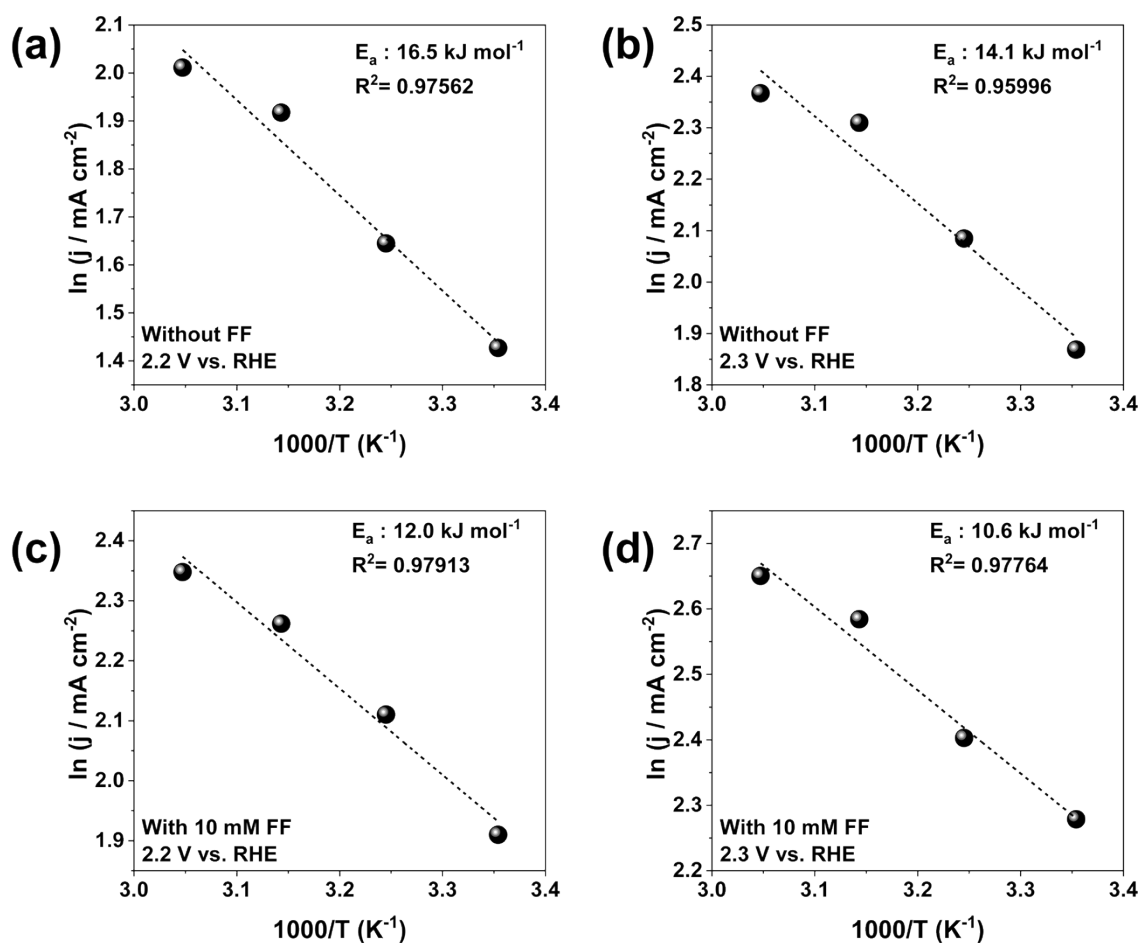

**Fig. S32** Activation energy ( $E_a$ ) of  $\text{PbO}_x$  in  $0.1 \text{ M H}_2\text{SO}_4$  at (a)  $2.2 \text{ V vs. RHE}$ , and (b)  $2.3 \text{ V vs. RHE}$ , and with  $10 \text{ mM FF}$  in  $0.1 \text{ M H}_2\text{SO}_4$  at (c)  $2.2 \text{ V vs. RHE}$ , and (d)  $2.3 \text{ V vs. RHE}$ . The  $E_a$  value was obtained from slope based on Arrhenius plot of log scale of current densities to reciprocal temperature values.

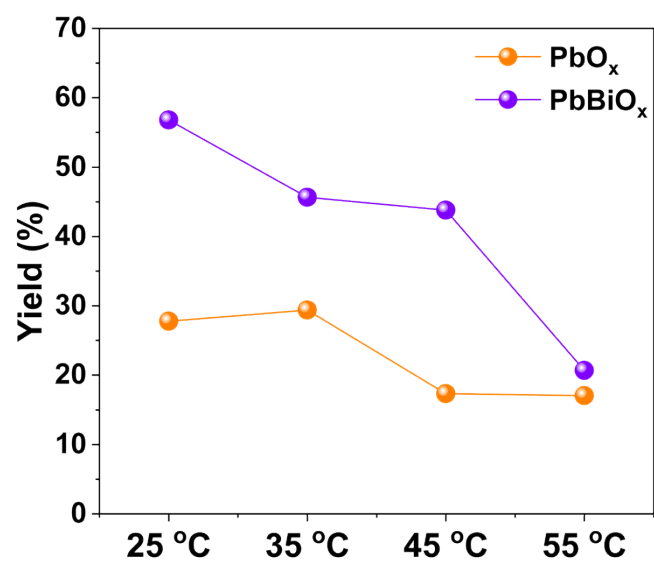

**Fig. S33** The FFOR electrolysis results of MA yield using PbO<sub>x</sub>, and PbBiO<sub>x</sub> at different temperatures under 2.2 V vs. RHE. The orange line is the results of the PbO<sub>x</sub>, and the purple line is the results of the PbBiO<sub>x</sub>.

**Table S1** Comparison of the FFOR catalytic performance of  $\text{Pb}_{0.9}\text{Bi}_{0.1}\text{O}_x$  with other FFOR system.

|                                                  | Catalyst                                                                                                                 | FF Concentration (amount) | Electrolyte (Solvent)                      | Potential (vs. RHE) | FF Conversion | MA Yield           | MA Selectivity in liquids <sup>b</sup>     | Additional condition                                   | Ref.      |
|--------------------------------------------------|--------------------------------------------------------------------------------------------------------------------------|---------------------------|--------------------------------------------|---------------------|---------------|--------------------|--------------------------------------------|--------------------------------------------------------|-----------|
| Electrochemical System                           | $\text{Pb}_{0.9}\text{Bi}_{0.1}\text{O}_x$                                                                               | 10 mM                     | 0.1 M $\text{H}_2\text{SO}_4$              | 2.2 V               | 100%          | 57%                | 90.4%                                      | -                                                      | This work |
|                                                  | $\text{Pb}_{0.9}\text{Bi}_{0.1}\text{O}_x$                                                                               | 10 mM                     | 0.5 M $\text{H}_2\text{SO}_4$              | 2.2 V               | 100%          | 55%                | >99%                                       | -                                                      | This work |
|                                                  | ED <sup>a</sup><br>$\text{PbO}_x$                                                                                        | 10 mM                     | pH 1 $\text{H}_2\text{SO}_4$               | 2.0 V               | 99%           | 65.1 %             | 76.3%                                      | -                                                      | 1         |
|                                                  | Pt/C                                                                                                                     | 100 mM                    | 0.25 M $\text{HClO}_4$                     | 1.3 V               | -             | -                  | >5%                                        | -                                                      | 2         |
|                                                  | $\text{C}_{3.0}\text{N-Se}_{0.03}$                                                                                       | 10 mM                     | 0.5 M $\text{KHCO}_3$                      | 1.7 V (vs. Ag/AgCl) | 99.5%         | 84.2 %             | 84.0% <sup>c</sup>                         | -                                                      | 3         |
| Combined System                                  | 45 ppi RVC <sup>a</sup> +<br>ACT <sup>a</sup>                                                                            | 50 mM (HFN)               | Sodium Buffer <sup>c</sup>                 | 0.8 V (vs. Ag/AgCl) | >99%          | 89.9 %             | 92.7%                                      | hv, $\text{O}_2$ /<br>ACT <sup>d</sup>                 | 4         |
|                                                  | RVC +<br>EY@NKA <sup>a</sup> +<br>ACT                                                                                    | 20 mM                     | Carbonate buffer <sup>f</sup> /<br>NaOH    | 0.8 V (vs. A/AgCl)  | 100%          | 97%                | >99%                                       | hv <sup>g</sup>                                        | 5         |
| Thermochemical System                            | -                                                                                                                        | 1 mmol                    | $\text{HCOOH}$                             | -                   | 100%          | 95%                | -                                          | $\text{H}_2\text{O}_2$<br>1 mL <sup>h</sup> ,<br>60 °C | 6         |
|                                                  | TS-1 <sup>a</sup>                                                                                                        | 4.3wt. %                  | Acetic acid                                | -                   | 100%          | 60%                | -                                          | 80 °C, $\text{H}_2\text{O}_2$                          | 7         |
|                                                  | -                                                                                                                        | 1 mmol                    | ChCl-<br>oxalic acid<br>(DES) <sup>a</sup> | -                   | 100%          | ~30 %              | ~30%                                       | 50 °C<br>$\text{H}_2\text{O}_2$<br>10 mmol             | 8         |
|                                                  | -                                                                                                                        | >20wt. %                  | $\text{H}_2\text{O}$                       | -                   | 92%           | 70%                | 70%                                        | HFUS <sup>a</sup><br>565 kHz,<br>42 °C                 | 9         |
|                                                  | P-C-600 <sup>a</sup>                                                                                                     | 2.5 mmol                  | $\text{H}_2\text{O}$                       | -                   | >99%          | 76.3 %             | 76.3% <sup>c</sup>                         | $\text{H}_2\text{O}_2$<br>20 mmol<br>60 °C             | 10        |
|                                                  | Amberlyst-15                                                                                                             | 1 mmol                    | $\text{H}_2\text{O}$                       | -                   | >99%          | 11%                | 13%                                        | $\text{H}_2\text{O}_2$<br>4 mmol                       | 11        |
|                                                  | $\text{Nb}_2\text{O}_5$                                                                                                  | 1 mmol                    | $\text{H}_2\text{O}$                       | -                   | >99%          | 5%                 | 15%                                        | $\text{H}_2\text{O}_2$<br>4 mmol                       | 11        |
|                                                  | $\text{CaCuP}_2\text{O}_7$                                                                                               | 0.25 g                    | $\text{H}_2\text{O}$                       | -                   | ~75%          | 37.4 %             | 54.8% <sup>c</sup>                         | 115 °C,<br>0.8 MPa $\text{O}_2$                        | 12        |
|                                                  | $\text{H}_3\text{PV}_2\text{Mo}_{10}\text{O}_{40}$<br>•x $\text{H}_2\text{O}$<br>+ $\text{Cu}(\text{CF}_3\text{SO}_2)_2$ | 2.4 mmol                  | $\text{CH}_3\text{CN}$ ,<br>acetic acid    | -                   | 98.7%         | 54%                | 87.8%                                      | 20 atm $\text{O}_2$ ,<br>110 °C                        | 13        |
|                                                  | $\text{V}_2\text{O}_5/\gamma\text{-Al}_2\text{O}_3$                                                                      | 1 vol%                    | $\text{O}_2/\text{N}_2$<br>(Gas Phase)     | -                   | >99%          | ~70 % <sup>i</sup> | -                                          | 20vol% $\text{O}_2$ ,<br>300 °C                        | 14        |
| $\text{CuMoO}_4$ /<br>$\text{Cu}(\text{NO}_3)_3$ | 1 mmol                                                                                                                   | $\text{H}_2\text{O}$      | -                                          | 99%                 | 74%           | 82%                | PMS <sup>a</sup> ,<br>2 MPa air,<br>140 °C | 15                                                     |           |

<sup>a</sup> Acronyms: ED: electrodeposited, RVC: reticulated vitreous carbon, ACT: 4-acetamido-2,2,6,6-tetramethylpiperidine-1-oxyl, EY@NKA: resin-supported Eosin Y (photo-oxygenation) DES: deep eutectic solvent, TS-1: titanium silicate-1, HFUS: high frequency ultrasound, P-C-600: pyrolysis of phytic acid at 600 °C annealing temperature, PMS: peroxymonosulfate.

$$\text{selectivity of liquid products: } \text{Selectivity in liquid products (\%)} = \frac{\text{yield of certain product}}{\text{yield of all liquid products}} \times 100$$

$$\text{selectivity products: } \text{Selectivity of products (\%)} = \frac{\text{yield of certain product}}{\text{yield of all liquid products}} \times 100$$

<sup>d</sup> The production of MA was conducted via two step reaction. The reaction from FF to HFN occurred via photochemical oxidation in methanol solvent with photochemically generated singlet oxygen as oxidant and ACT-mediated electrocatalytic reaction from HFN to FF was operated.

<sup>e</sup> 0.34 M  $\text{Na}_2\text{CO}_3$  + 0.06 M  $\text{NaHCO}_3$  as anolyte, NaOH as catholyte.

<sup>f</sup> 0.34 M  $\text{Na}_2\text{CO}_3$  + 0.06 M  $\text{NaHCO}_3$  (pH 8.5).

<sup>g</sup> ACT-mediated photoelectrocatalytic reaction using EY@NKA as photo-oxygenation under irradiation by LEDs.

<sup>h</sup> 3.5-fold amount of H<sub>2</sub>O<sub>2</sub> volume than FF.

<sup>i</sup> Maleic anhydride which converted to maleic acid in aqueous solution.

**Table S2** Results of FFOR depending on different electrolyte (pH).

| Electrolyte (pH)                                                    | FF Conversion (%) | MA Yield (%) | HFN Yield (%) | HFA Yield (%) | FA Yield (%) | Applied Potential (vs. RHE) | Passed Charge (C) |
|---------------------------------------------------------------------|-------------------|--------------|---------------|---------------|--------------|-----------------------------|-------------------|
| 0.1 M H <sub>2</sub> SO <sub>4</sub> (pH 1)                         | 100               | 26.9%        | 25.3          | 0             | 1.4          | 2.2                         | 250               |
| 0.1 M NaHPO <sub>4</sub> /Na <sub>2</sub> PO <sub>4</sub> (pH 6.77) | 100               | 16.4%        | 45.6%         | -             | 16.0%        | 2.4                         | 250               |
| 0.1 M KOH <sup>a</sup> (pH 13)                                      | 75.3%             | 9.1%         | -             | -             | -            | 2.4                         | 135               |

<sup>a</sup> Other intermediate species were not detected due to degradation of organic species in alkaline media.

**Table S3** FFOR results of PbO<sub>x</sub> at 2.2 V vs. RHE.

| Passed Charge (C) | FF Conversion (%) | MA Yield (%) | HFN Yield (%) | HFA Yield (%) | FA Yield (%) | Loss (%) | F.E (%) |
|-------------------|-------------------|--------------|---------------|---------------|--------------|----------|---------|
| 50                | 72.4              | 8.5          | 26.8          | 7.3           | 12.8         | 29.8     | 72.0    |
| 100               | 96.5              | 17           | 41.7          | 7.0           | 11.1         | 33.0     | 58.9    |
| 150               | 100               | 22.2         | 41.3          | 1.5           | 5.4          | 35.0     | 40.1    |
| 200               | 100               | 26.2         | 34.8          | 0             | 2.5          | 39.0     | 29.3    |
| 250               | 100               | 26.9         | 25.3          | 0             | 1.4          | 47.8     | 20.6    |
| 300               | 100               | 27.2         | 22.1          | 0             | 1.5          | 50.6     | 16.5    |

**Table S4** FFOR results of Pb<sub>0.95</sub>Bi<sub>0.05</sub>O<sub>x</sub> at 2.2 V vs. RHE.

| Passed Charge (C) | FF Conversion (%) | MA Yield (%) | HFN Yield (%) | HFA Yield (%) | FA Yield (%) | Loss (%) | F.E (%) |
|-------------------|-------------------|--------------|---------------|---------------|--------------|----------|---------|
| 50                | 64.6              | 10.1         | 34.7          | 1.5           | 28.5         | 18.3     | 90.6    |
| 100               | 93.6              | 24.0         | 47.3          | 2.0           | 18.9         | 20.4     | 74.2    |
| 150               | 100               | 35.3         | 33.2          | 0             | 10.7         | 31.5     | 49.3    |
| 200               | 100               | 42.6         | 18.8          | 0             | 2.7          | 38.6     | 34.8    |
| 250               | 100               | 45.8         | 11.5          | 0             | 2.0          | 42.6     | 26.8    |
| 300               | 100               | 50.0         | 8.1           | 0             | 1.1          | 42.2     | 22.9    |

**Table S5** FFOR results of Pb<sub>0.95</sub>Bi<sub>0.05</sub>O<sub>x</sub> at 2.2 V vs. RHE.

| Passed Charge (C) | FF Conversion (%) | MA Yield (%) | HFN Yield (%) | HFA Yield (%) | FA Yield (%) | Loss (%) | F.E (%) |
|-------------------|-------------------|--------------|---------------|---------------|--------------|----------|---------|
| 50                | 71.5              | 0            | 28.2          | 6.3           | 18.7         | 28.6     | 89.4    |
| 100               | 96.8              | 8.4          | 47.5          | 5.0           | 17.9         | 35.4     | 57.6    |
| 150               | 100               | 18.9         | 28.1          | 0.8           | 6.0          | 44.0     | 42.1    |
| 200               | 100               | 35.8         | 20.9          | 0             | 3.3          | 43.2     | 31.1    |

|     |     |      |      |   |     |      |      |
|-----|-----|------|------|---|-----|------|------|
| 250 | 100 | 36.8 | 14.0 | 0 | 2.0 | 49.2 | 23.0 |
|-----|-----|------|------|---|-----|------|------|

**Table S6** FFOR results of  $\text{Pb}_{0.85}\text{Bi}_{0.15}\text{O}_x$  at 2.2 V vs. RHE.

| Passed Charge (C) | FF Conversion (%) | MA Yield (%) | HFN Yield (%) | HFA Yield (%) | FA Yield (%) | Loss (%) | F.E (%) |
|-------------------|-------------------|--------------|---------------|---------------|--------------|----------|---------|
| 50                | 66.2              | 9.7          | 29.5          | 2.7           | 23.5         | 24.2     | 84.7    |
| 100               | 91.2              | 19.3         | 43.1          | 2.7           | 27.3         | 36.0     | 67.7    |
| 150               | 99.7              | 27.2         | 41.7          | 0.4           | 16.1         | 30.4     | 49.9    |
| 200               | 100               | 32.0         | 35.1          | 0             | 7.1          | 32.8     | 37.3    |
| 250               | 100               | 35.6         | 26.6          | 0             | 4.9          | 37.8     | 28.4    |
| 300               | 100               | 38.4         | 21.5          | 0             | 2.3          | 40.1     | 23.2    |

**Table S7** FFOR results of  $\text{Pb}_{0.8}\text{Bi}_{0.2}\text{O}_x$  at 2.2 V vs. RHE.

| Passed Charge | FF Conversion (%) | MA Yield (%) | HFN Yield (%) | HFA Yield (%) | FA Yield (%) | Loss (%) | F.E (%) |
|---------------|-------------------|--------------|---------------|---------------|--------------|----------|---------|
| 50            | 70.2              | 9.7          | 35.6          | 3.5           | 31.2         | 21.4     | 91.5    |
| 100           | 96.0              | 17.6         | 47.3          | 2.6           | 23.6         | 28.4     | 67.9    |
| 150           | 100               | 22.3         | 42.8          | 0             | 20.4         | 34.9     | 45.5    |
| 200           | 100               | 28.3         | 42.3          | 0             | 14.9         | 29.4     | 37.2    |
| 250           | 100               | 31.1         | 35.4          | 0             | 9.0          | 33.5     | 28.7    |
| 300           | 100               | 32.8         | 28.5          | 0             | 5.7          | 38.6     | 22.4    |

**Table S8** The Bi and Pb ratio of  $\text{PbBiO}_x$  based on EDS mapping.

| Sample Name                                  | Contents (atomic %) |      |       |       | Bi/Pb (%) |
|----------------------------------------------|---------------------|------|-------|-------|-----------|
|                                              | Pb                  | Bi   | O     | Sn    |           |
| $\text{Pb}_{0.95}\text{Bi}_{0.05}\text{O}_x$ | 19.46               | 1.15 | 64.75 | 14.64 | 5.91      |
| $\text{Pb}_{0.9}\text{Bi}_{0.1}\text{O}_x$   | 18.90               | 1.91 | 66.68 | 12.51 | 10.11     |
| $\text{Pb}_{0.85}\text{Bi}_{0.15}\text{O}_x$ | 8.50                | 1.36 | 68.56 | 21.58 | 16.00     |
| $\text{Pb}_{0.8}\text{Bi}_{0.2}\text{O}_x$   | 15.09               | 3.65 | 65.31 | 15.94 | 24.19     |

## References

1. S. R. Kubota and K.-S. Choi, *ACS Sustainable Chem. Eng.*, 2018, **6**, 9596-9600.
2. A. M. Román, J. C. Hasse, J. W. Medlin and A. Holewinski, *ACS Catal.*, 2019, **9**, 10305-10316.
3. X. Huang, J. Song, M. Hua, B. Chen, Z. Xie, H. Liu, Z. Zhang, Q. Meng and B. Han, *Chem. Sci.*, 2021, **12**, 6342-6349.
4. S. Thiagarajan, D. Franciolus, R. J. Bisselink, T. A. Ewing, C. G. Boeriu and J. Van Haveren, *ACS Sustainable Chem. Eng.*, 2020, **8**, 10626-10632.
5. G.-H. Lu, M.-H. Zong and N. Li, *ACS Catal.*, 2023, **13**, 1371-1380.
6. X. Li, B. Ho, D. S. W. Lim and Y. Zhang, *Green Chem.*, 2017, **19**, 914-918.
7. Y. Lou, S. Marinkovic, B. Estrine, W. Qiang and G. r. Enderlin, *ACS Omega*, 2020, **5**, 2561-2568.
8. Y. Ni, Z. Bi, H. Su and L. Yan, *Green Chem.*, 2019, **21**, 1075-1079.
9. N. Ayoub, J. Toufaily, E. Guénin and G. Enderlin, *Green Chem.*, 2022, **24**, 4164-4173.
10. H. Zhang, S. Wang, H. Zhang, J. H. Clark and F. Cao, *Green Chem.*, 2021, **23**, 1370-1381.
11. H. Choudhary, S. Nishimura, and K. Ebitani, *Appl. Catal. A*, 2013, **458**, 55-62.
12. T. Soták, M. Hronec, M. Gál, E. Dobročka and J. Škriniarová, *Catal. Lett.*, 2017, **147**, 2714-2723.
13. J. Lan, Z. Chen, J. Lin and G. Yin, *Green Chem.*, 2014, **16**, 4351-4358.
14. N. Alonso-Fagúndez, M. Ojeda, R. Mariscal, J. L. G. Fierro and M. López Granados, *J. Catal.*, 2017, **348**, 265-275.
15. X. Yu, H. Liu, Q. Wang, W. Jia, H. Wang, W. Li, J. Zheng, Y. Sun, X. Tang, X. Zeng, F. Xu and L. Lin *ACS Sustainable Chem. Eng.*, 2021, **9**, 13176-13187.
